# Supplementary material for: Population Structure and Genetic Diversity of Two-Rowed Barley Accessions from Kazakhstan Based on SNP Genotyping Data
Source: MDPI journal article supplement (doi:10.3390/plants10102025), 2021-09-27
Supplement: s1 [file s1]

1H

2H

3H

4H

0.0 BOPA1\_3692-940  
1.7 *HvHXK4*  
5.4 *HvBRD*  
7.4 SCRI\_RS\_213799  
13.3 *HvRAX1*  
13.4 SCRI\_RS\_231889  
18.1 SCRI\_RS\_153672  
19.9 *Ppd-H1/HvPRR37*  
22.2 SCRI\_RS\_131218

39.4 BOPA1\_ABC03253-1-2-279 *HvDWT1*  
41.8 *HvCO18*  
41.9 SCRI\_RS\_141655  
42.0 BOPA1\_265-1229  
49.1 BOPA1\_3598-489  
50.0 *HvFT4*  
50.5 SCRI\_RS\_198460  
50.6 SCRI\_RS\_158928  
58.0 *eps2/HvCEN/eam6*  
58.1 *HvSUSIBA2/HvHOX2*  
58.2 BOPA2\_12\_31288  
58.3 BOPA1\_ABC06091-1-1-187  
58.8 BOPA1\_4717-386  
58.9 BOPA2\_12\_10948  
59.4 *HD6-2H/HvKNOX1*  
59.9 BOPA1\_1826-229  
60.0 SCRI\_RS\_165574  
62.0 BOPA2\_12\_10545  
64.6 SCRI\_RS\_198848  
64.7 *HvCO4*  
69.3 BOPA1\_6804-1197  
75.2 BOPA1\_7549-782 *Vrs1*  
90.1 BOPA1\_8632-1809  
90.4 *HvMAX3/HvCCD7/HvHTD1/HvD17*  
103.7 BOPA1\_8523-316  
107.2 BOPA2\_12\_31402  
107.3 *BFL/HvAPO2*  
112.2 *HvSSIIIb* SCRI\_RS\_151556  
112.9 BOPA1\_111-499

14.9 SCRI\_RS\_209312  
15.2 *HvSTE1/HvD7*

37.1 *HvAS2* SCRI\_RS\_136959  
39.5 SCRI\_RS\_237761  
39.6 *Vrs4*  
51.3 SCRI\_RS\_906 *HvBR1/HvD61/uzu1*  
51.6 SCRI\_RS\_90637  
52.0 *HvFT2*  
52.6 BOPA1\_4453-422  
59.1 BOPA1\_8180-450  
59.3 *HvHXK9*  
59.6 SCRI\_RS\_13376  
62.5 SCRI\_RS\_138291 *HvHXK6*  
62.8 SCRI\_RS\_225522  
62.9 *HvMAX4/HvCCD8/HvD10*  
64.1 *HvGA2ox1*  
64.2 BOPA1\_4149-219

88.2 SCRI\_RS\_174067  
90.2 *HvLNT-1*

98.2 *HvCMF1*  
100.3 BOPA1\_2500-1514  
104.5 BOPA2\_12\_31220  
106.0 *HvGA20ox3*

25.8 *INT-C*  
26.3 *HvCO10*  
27.5 BOPA1\_1001-1187

50.0 BOPA2\_12\_30605  
50.8 SCRI\_RS\_154048  
51.0 BOPA2\_12\_31382  
51.1 *HvCO16*  
51.3 *HvPRR59*  
51.4 BOPA2\_12\_20156 *HvPhyB/HvPRR73/HvGELP112/HvWDL1*

66.0 SCRI\_RS\_143825  
66.9 *HvD14/HvHTD2*  
67.5 BOPA1\_4139-888

79.6 BOPA1\_ConsensusGBS0461-3  
81.6 *HvSUT1*

103.7 *HvCMF4*  
103.8 SCRI\_RS\_157611  
111.1 *HvRIM1*  
113.4 BOPA1\_2297-1250  
113.7 SCRI\_RS\_9164  
114.0 *Vrn-H2/HvZCCT-Ha/b/c*

5H

6H

7H

1.0 *HvSUT2*  
3.3 SCRI\_RS\_168359

43.7 *HvCO3*  
43.8 *HvTPS1*  
44.1 *HvND1/HvTFL1*  
44.2 BOPA1\_4152-573 *HvCPD*  
46.4 *HvCMF13*  
46.5 *HvAS1*  
46.6 *HvD53*  
47.2 *HvBC12/GGD1*

96.6 SCRI\_RS\_206565 *HvMND6*  
97.2 *HvPRR95*

125.5 SCRI\_RS\_133602  
125.6 BOPA1\_5571-640  
125.7 *Vrn-H1/HvPhyC*  
130.0 SCRI\_RS\_210928  
130.7 *HvRAX3*

165.8 SCRI\_RS\_194125  
168.8 SCRI\_RS\_219619 *HvGA20ox1*

49.2 SCRI\_RS\_234724 *HvCMF3*  
52.5 SCRI\_RS\_166120  
52.6 *HvCO7*  
54.8 *HvCYP734A7*  
55.0 BOPA1\_3658-1310 *HvCO5/HvCry1a/HvCry2*  
55.3 *HvPRR1/HvTOC1*  
55.4 BOPA1\_210-450  
58.4 SCRI\_RS\_223224  
59.1 *HvCry1b*  
65.0 BOPA1\_1140-1508  
67.9 BOPA2\_12\_31289 *HvCO14*  
68.2 BOPA1\_3773-756 *HvCO2*  
69.3 BOPA1\_7706-924  
70.0 BOPA1\_5187-752  
71.3 *HvCO11*

88.6 SCRI\_RS\_222802 *HvCOP1*

95.0 BOPA1\_10425-725 *HvTPS2*

1.7 *HvKAO1*  
1.9 *HvD3*  
2.5 SCRI\_RS\_13615  
4.1 SCRI\_RS\_42792  
11.8 BOPA2\_12\_31450  
12.8 *HvDLT*  
13.9 *HvWAXY*

27.6 SCRI\_RS\_106456  
27.7 BOPA1\_3313-1443  
29.9 *HvMAX2*  
34.3 *Vrn-H3/HvFT1*  
37.6 BOPA1\_1213-1959 *HvSSI*  
38.8 BOPA2\_12\_31305  
40.4 SCRI\_RS\_166536  
41.9 *HvCO8*

54.3 *HvSS*  
54.4 BOPA2\_12\_30880  
61.5 BOPA2\_12\_10657  
61.7 *HvVRT-2*  
61.8 BOPA1\_5695-922  
70.3 SCRI\_RS\_200107  
70.5 *HvCO15/HvWFP1/HvIPA1/HvSPL14*  
70.8 *HvLHY/HvCCA1*

120.4 BOPA1\_7216-297 *HvESR1*  
120.8 *HvCO6*

- genes associated with different allelic frequencies among Kazakhstan regions (KA, KV, and KB)
- genes associated with different allelic frequencies among Kazakhstan regions and between Kazakhstan and Europe
- genes associated with different allelic frequencies among Kazakhstan regions and between Kazakhstan and Africa
- genes associated with different allelic frequencies between Kazakhstan and Europe
- genes associated with different allelic frequencies between Kazakhstan and Africa
- genes associated with different allelic frequencies among Kazakhstan, Europe, and Africa
