# Supplementary material for: Population Structure and Genetic Diversity of Two-Rowed Barley Accessions from Kazakhstan Based on SNP Genotyping Data
Source: MDPI journal article supplement (doi:10.3390/plants10102025), 2021-09-27

**Figure S2. Principal Coordinates Analysis (PCoA) of seven barley groups with different breeding origins using single nucleotide polymorphism (SNPs) markers in seven individual chromosomes (from 1H to 7H) based on Nei Unbiased Distance index**

# 2R barley, 1H

597 samples (7 groups),  
225 SNP

## Principal Coordinates Analysis (PCoA) Pairwise Population Matrix of Nei Unbiased Genetic Distance

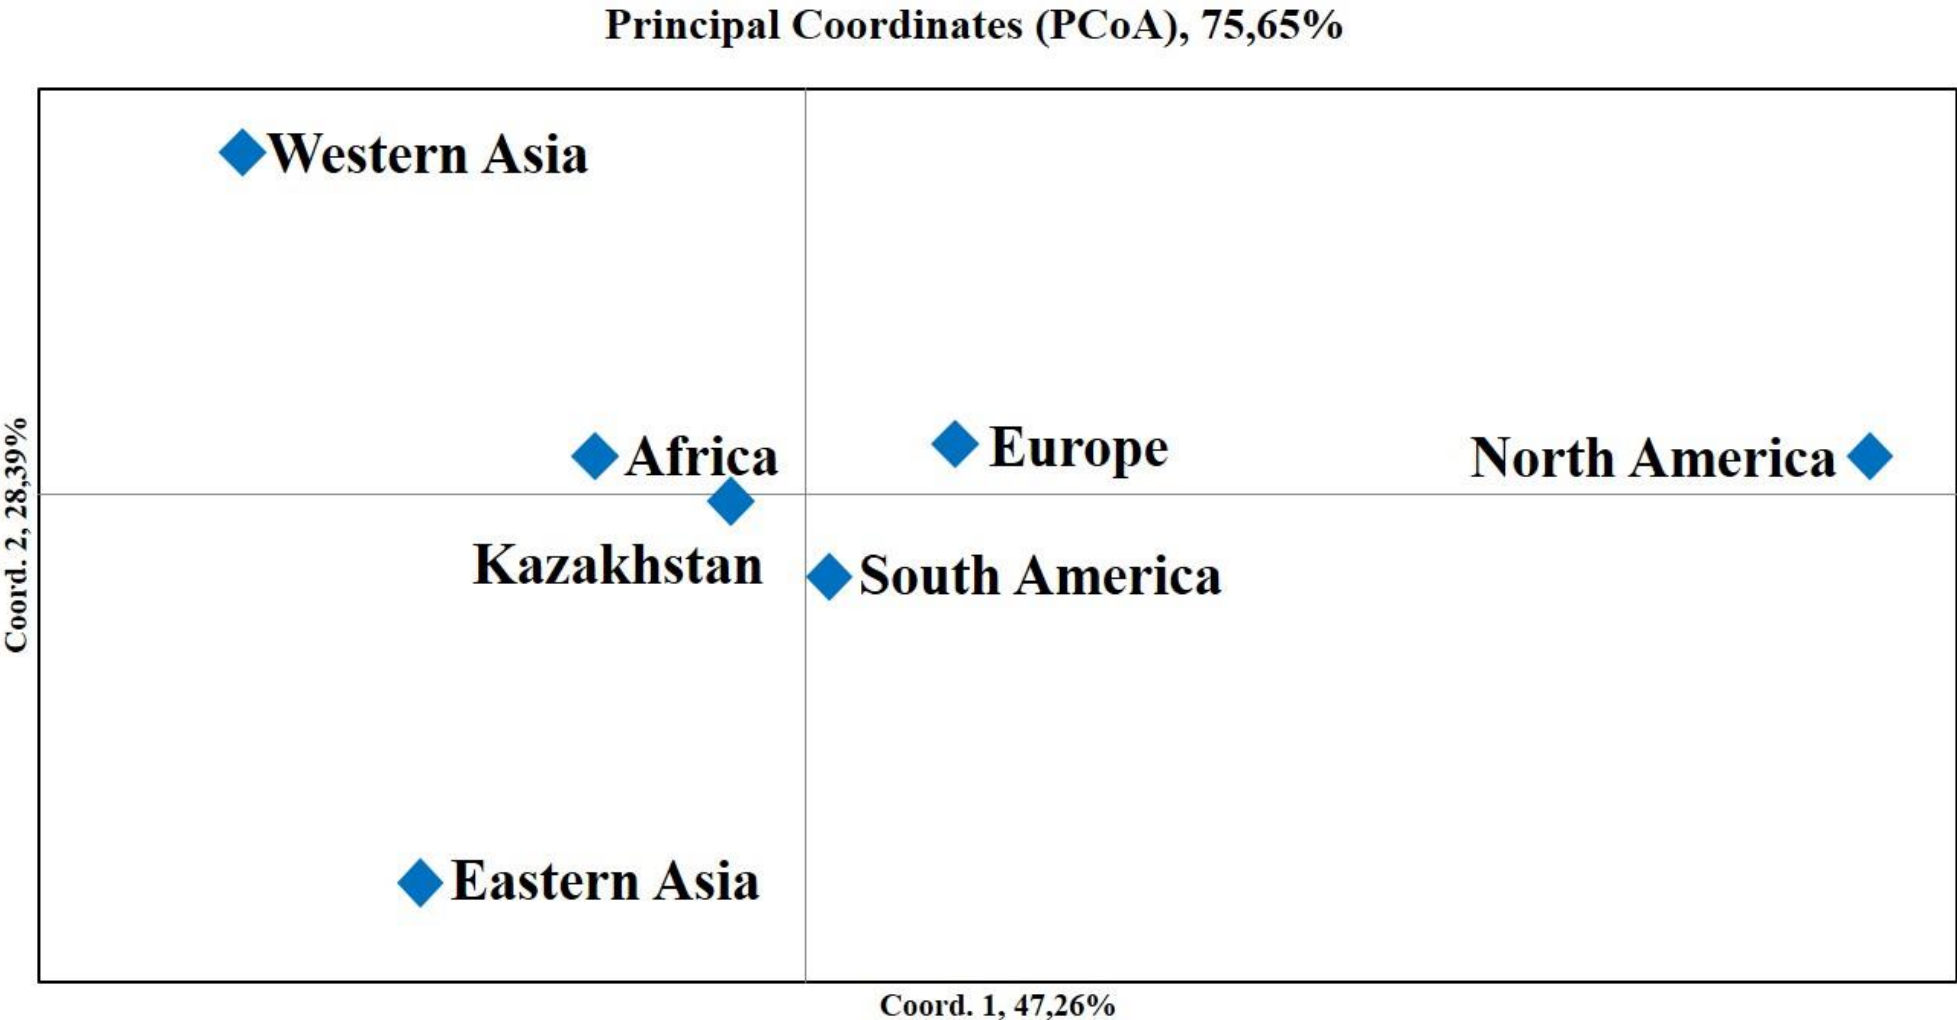

# 2R barley, 2H

597 samples (7 groups),  
296 SNP

## Principal Coordinates Analysis (PCoA) Pairwise Population Matrix of Nei Unbiased Genetic Distance

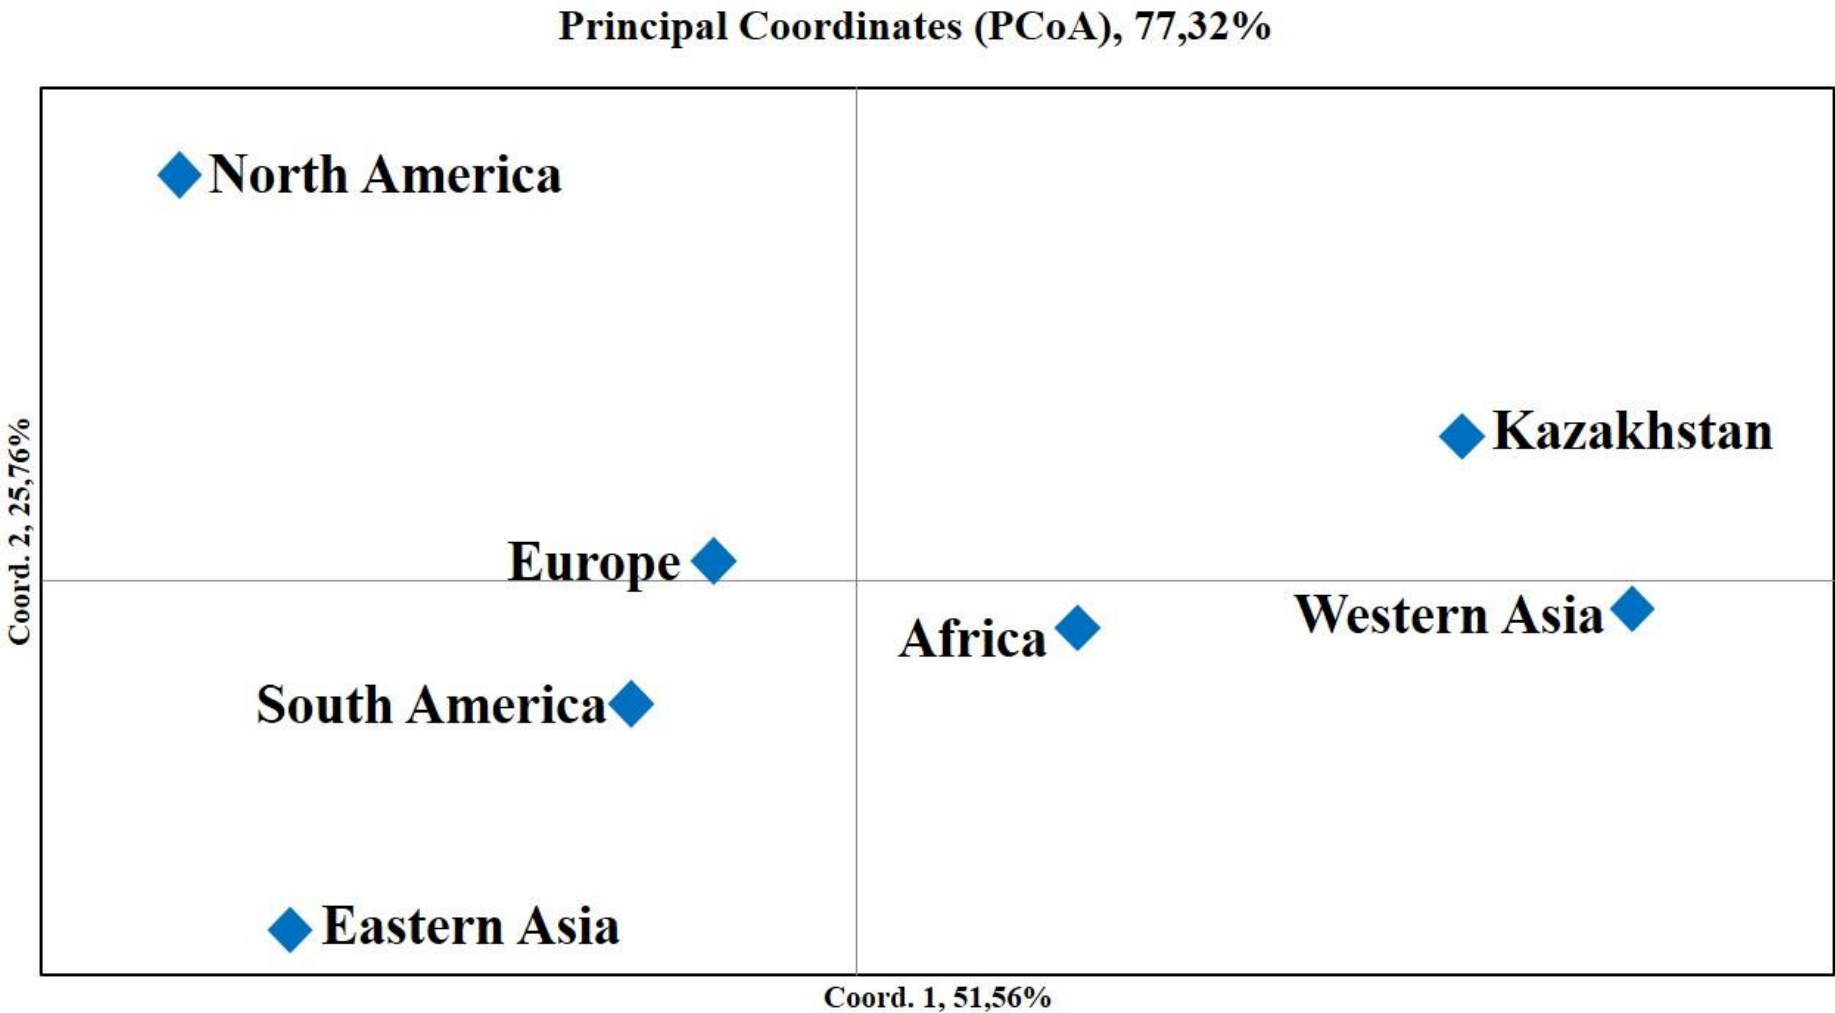

2R barley, 3H

597 samples (7 groups),  
293 SNP

Principal Coordinates Analysis (PCoA)  
Pairwise Population Matrix of Nei Unbiased Genetic Distance

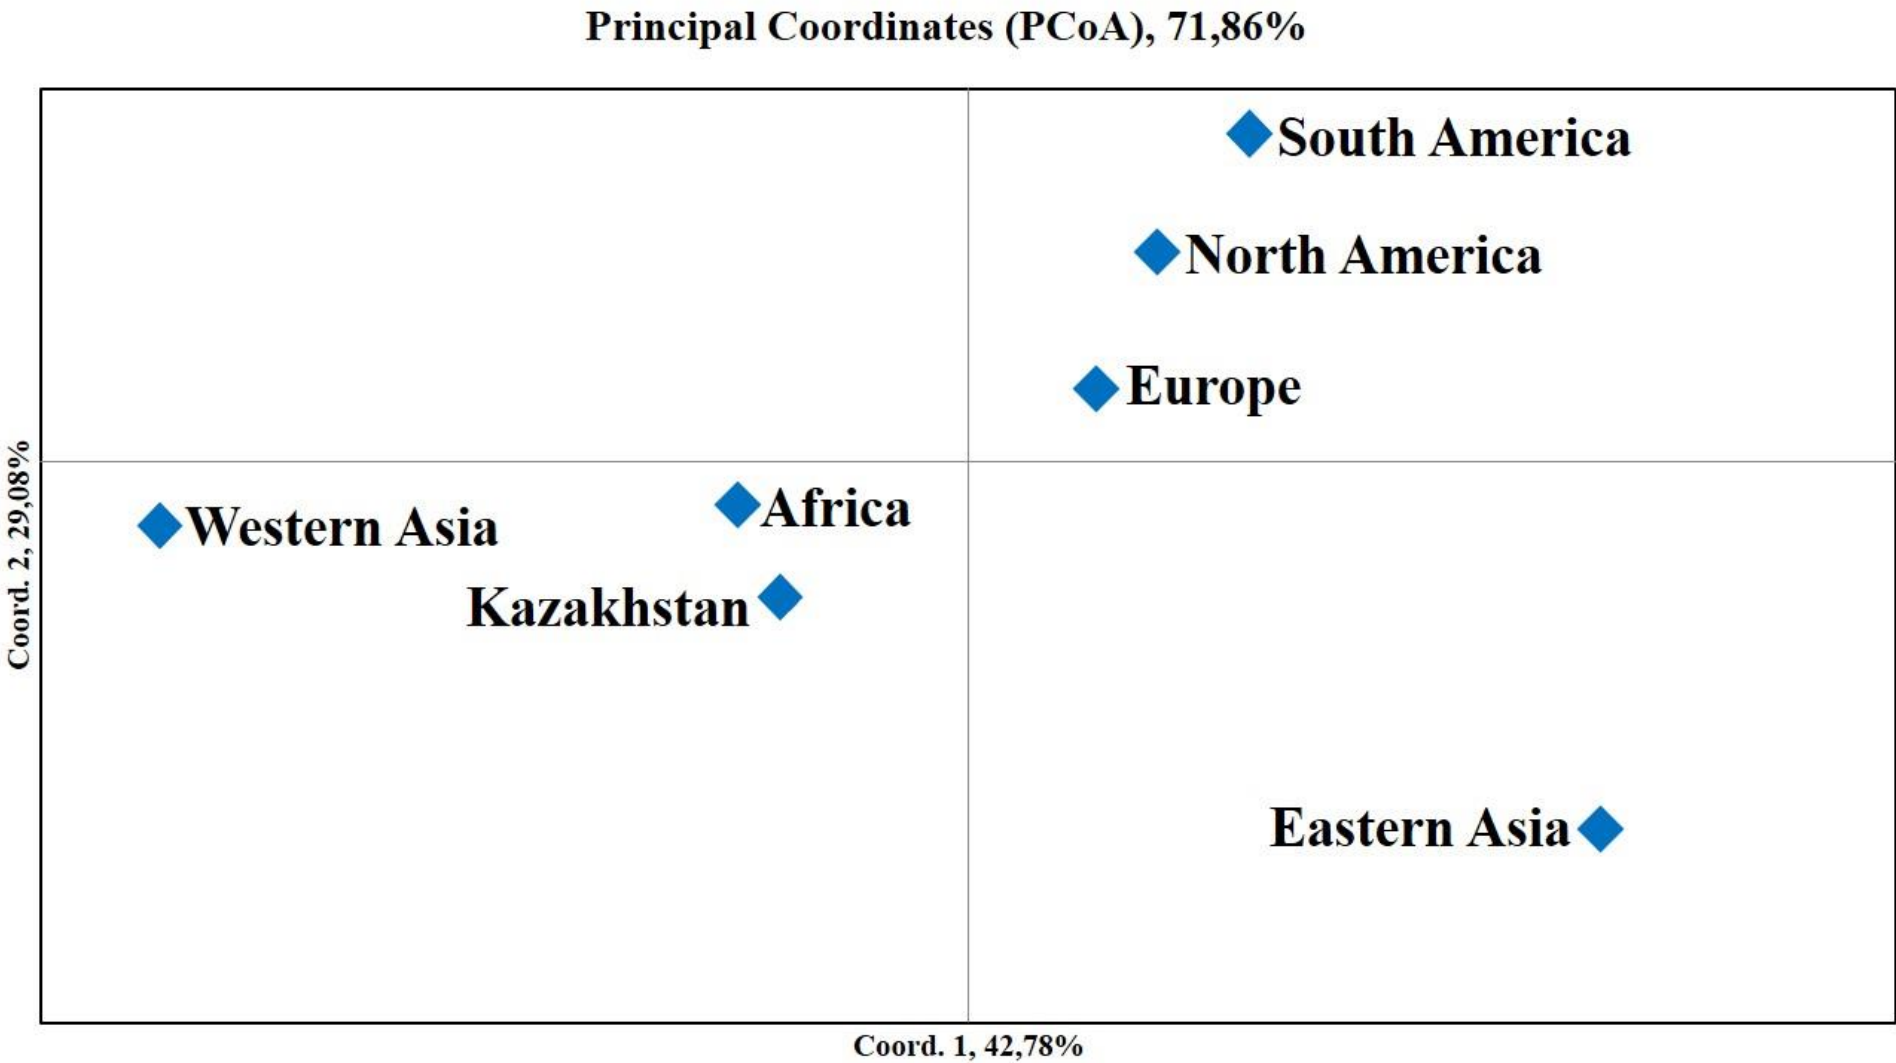

# 2R barley, 4H

597 samples (7 groups),  
230 SNP

## Principal Coordinates Analysis (PCoA) Pairwise Population Matrix of Nei Unbiased Genetic Distance

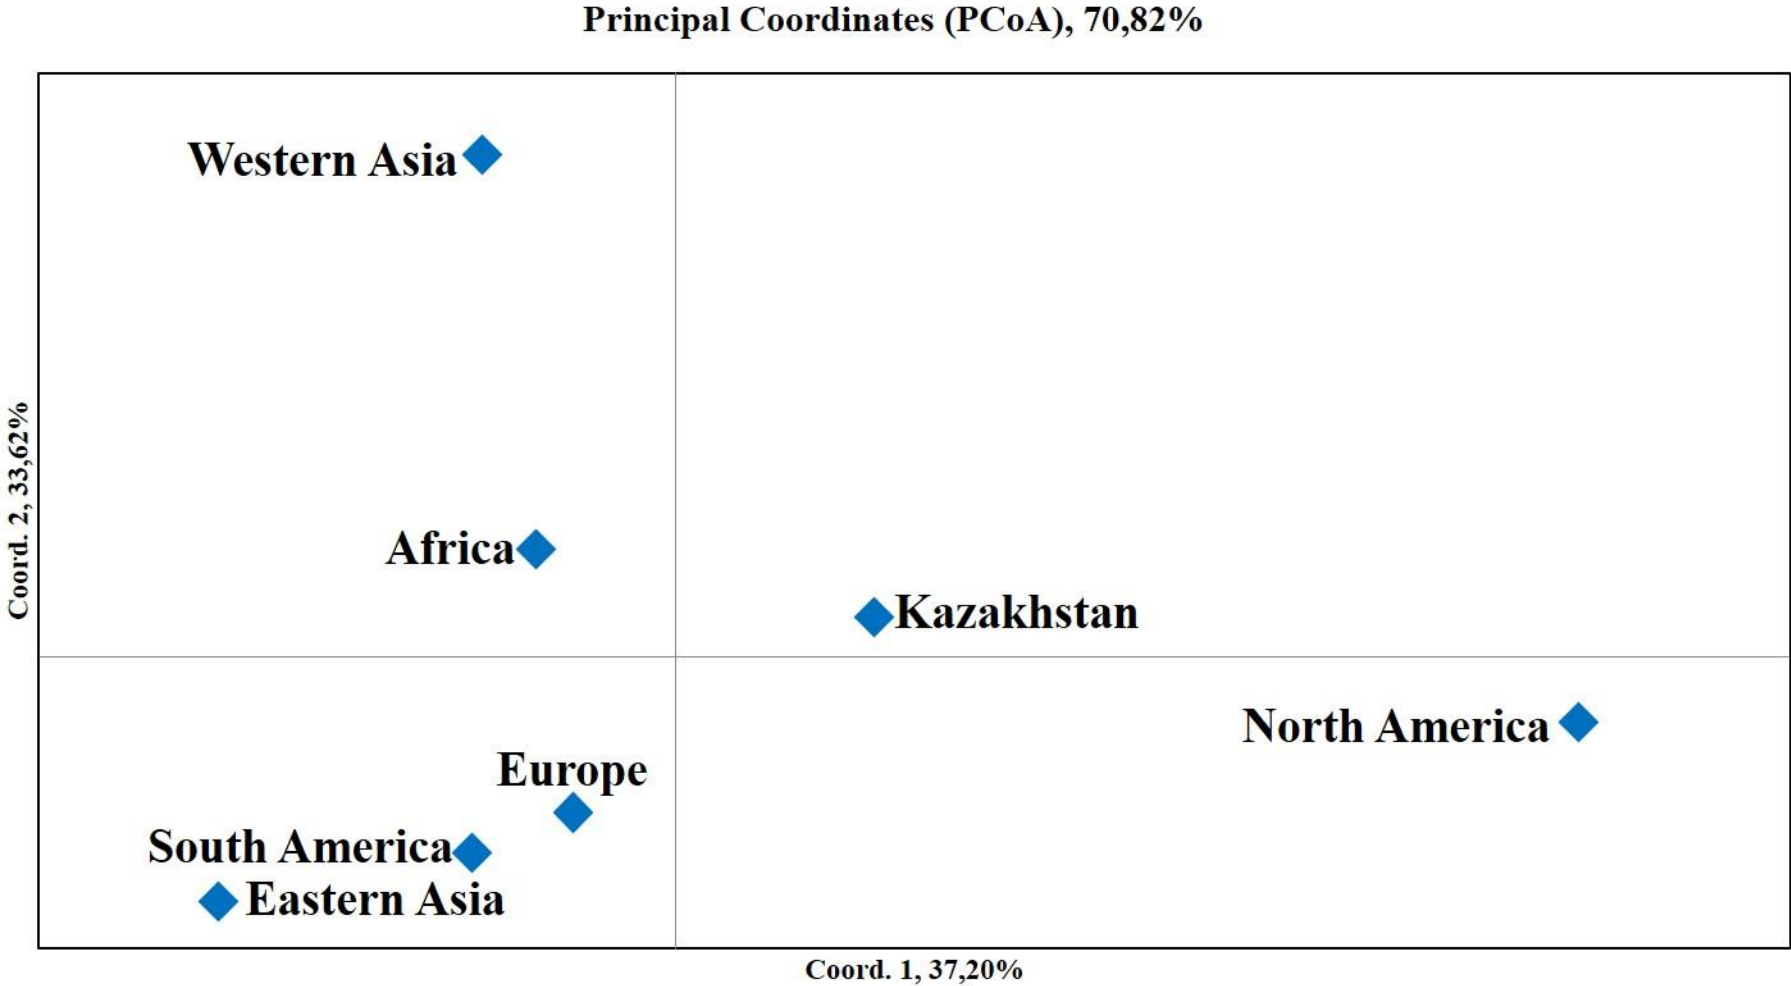

# 2R barley, 5H

597 samples (7 groups),  
357 SNP

## Principal Coordinates Analysis (PCoA) Pairwise Population Matrix of Nei Unbiased Genetic Distance

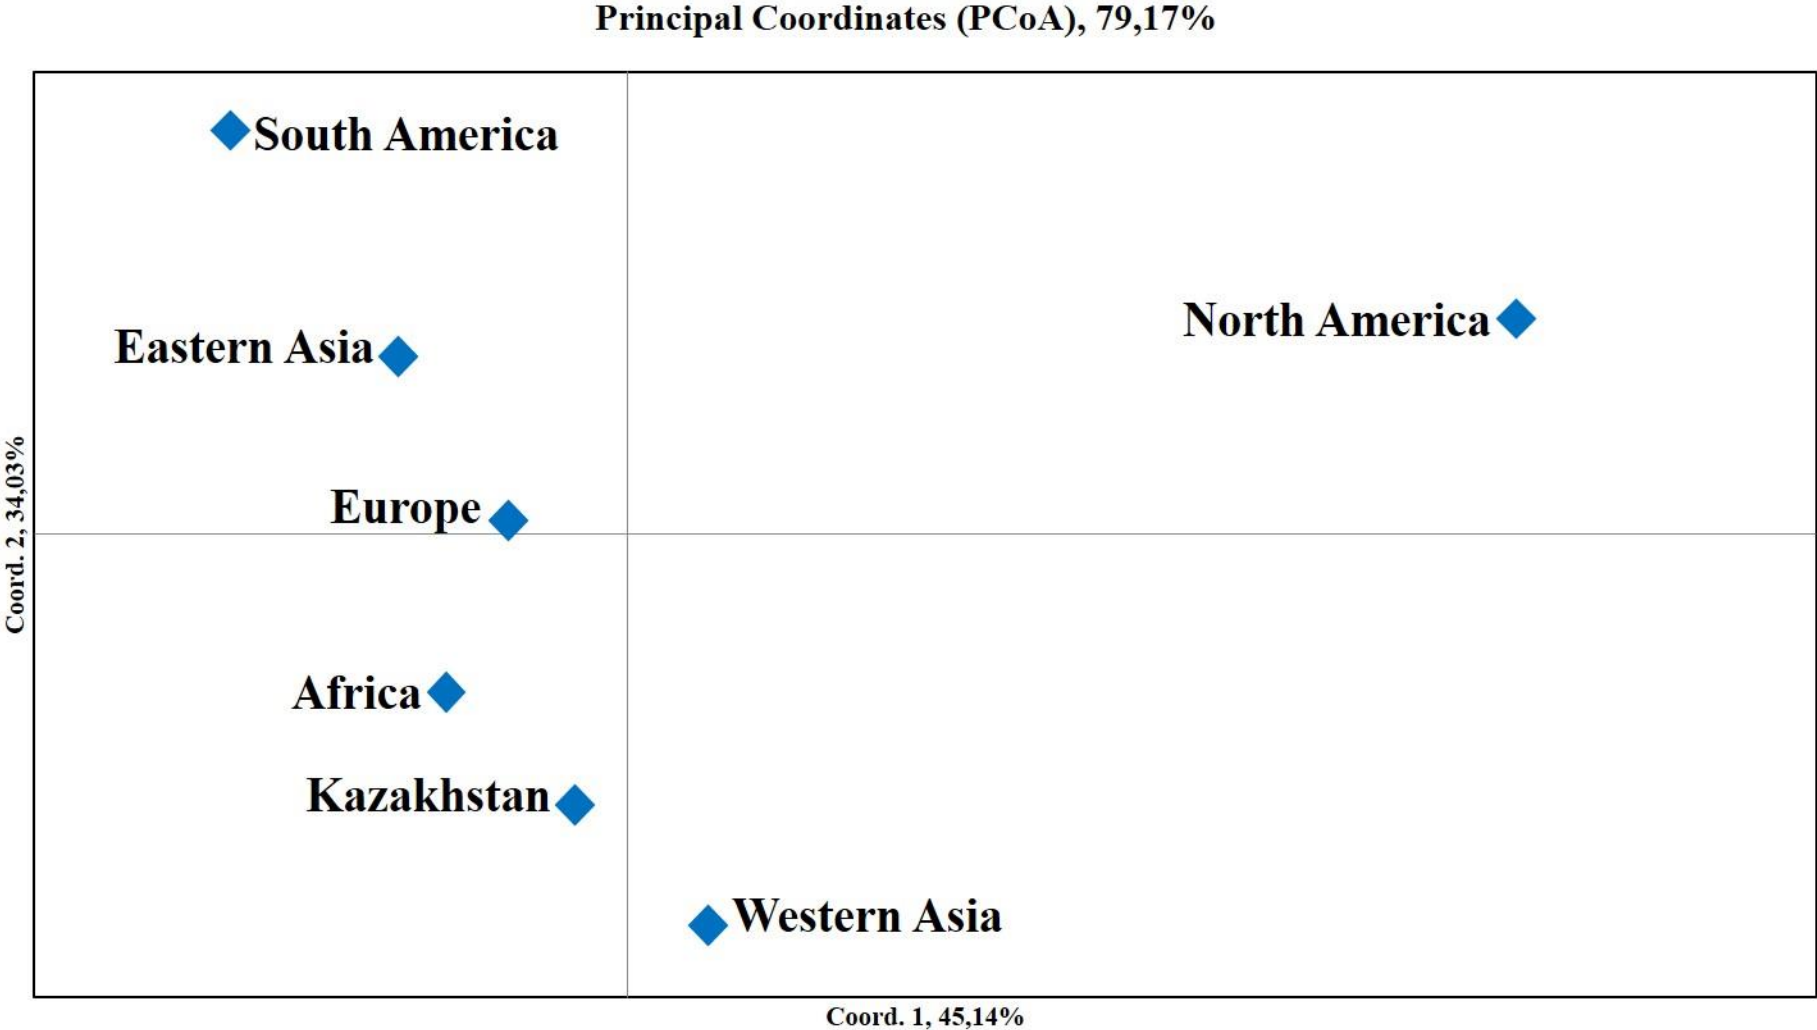

# 2R barley, 6H

597 samples (7 groups),  
246 SNP

## Principal Coordinates Analysis (PCoA) Pairwise Population Matrix of Nei Unbiased Genetic Distance (JPG)

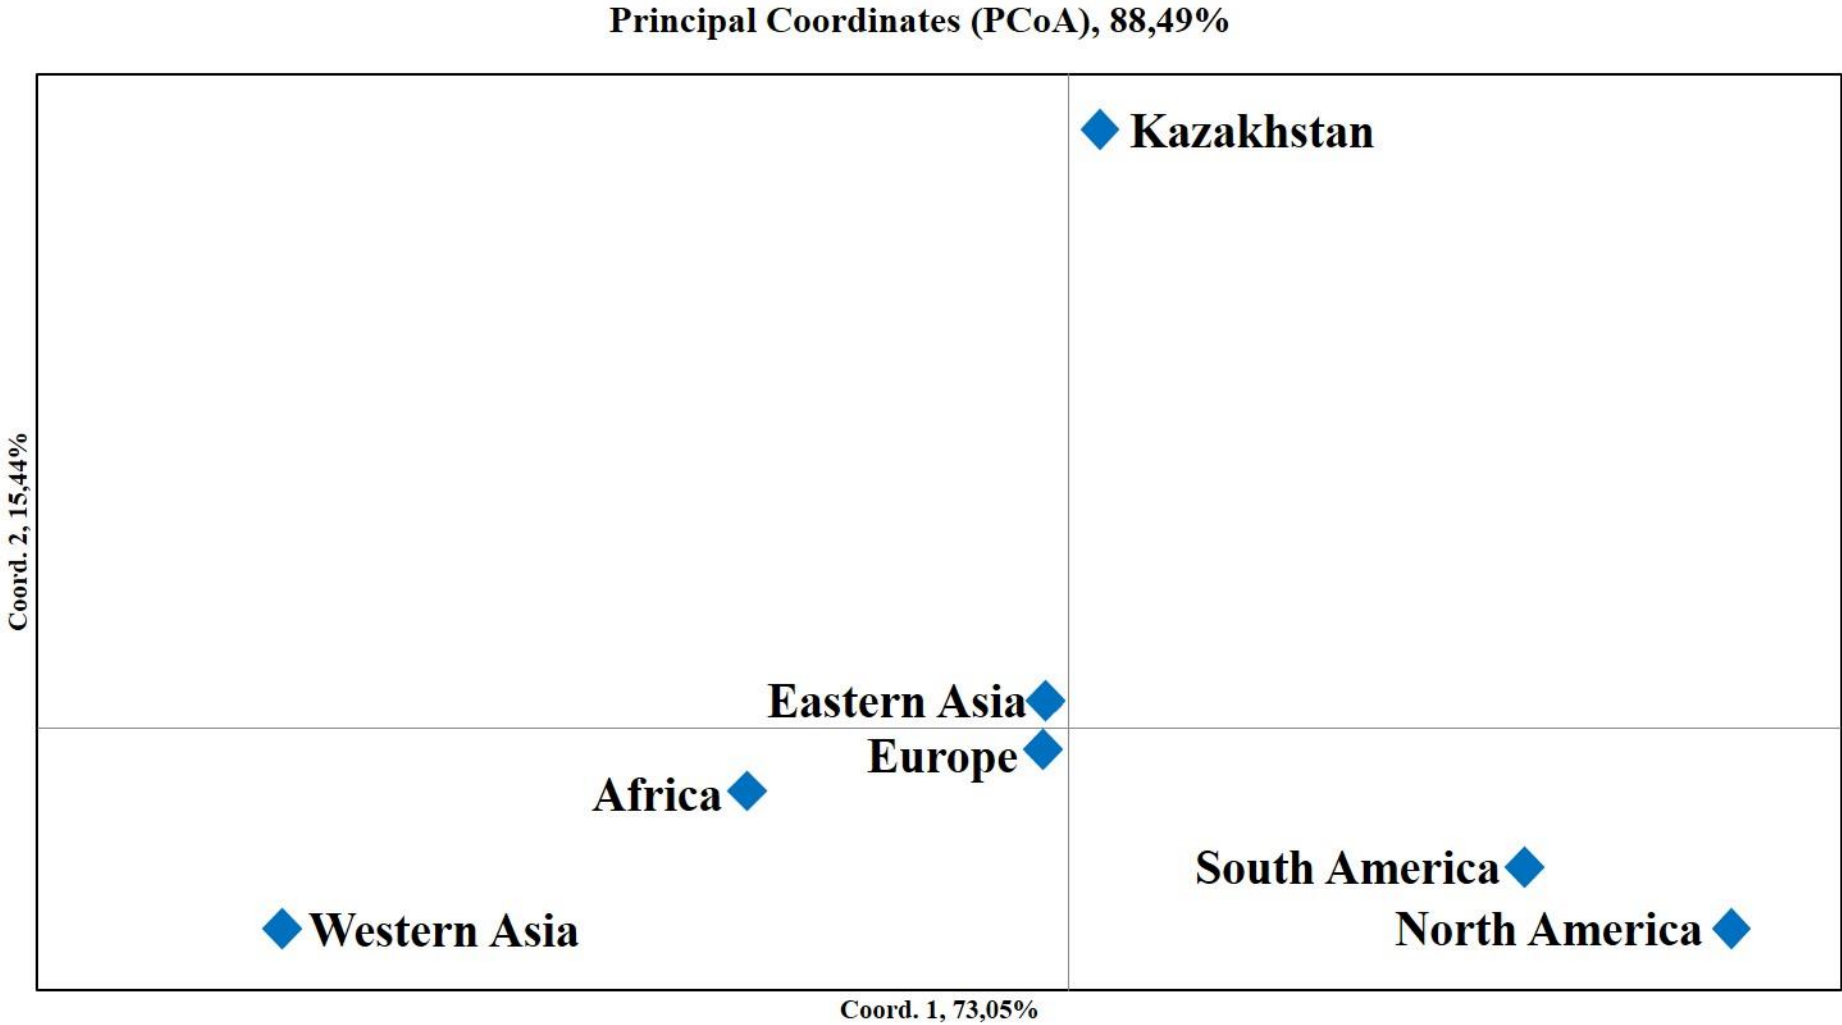

# 2R barley, 7H

597 samples (7 groups),  
271 SNP

## Principal Coordinates Analysis (PCoA) Pairwise Population Matrix of Nei Unbiased Genetic Distance

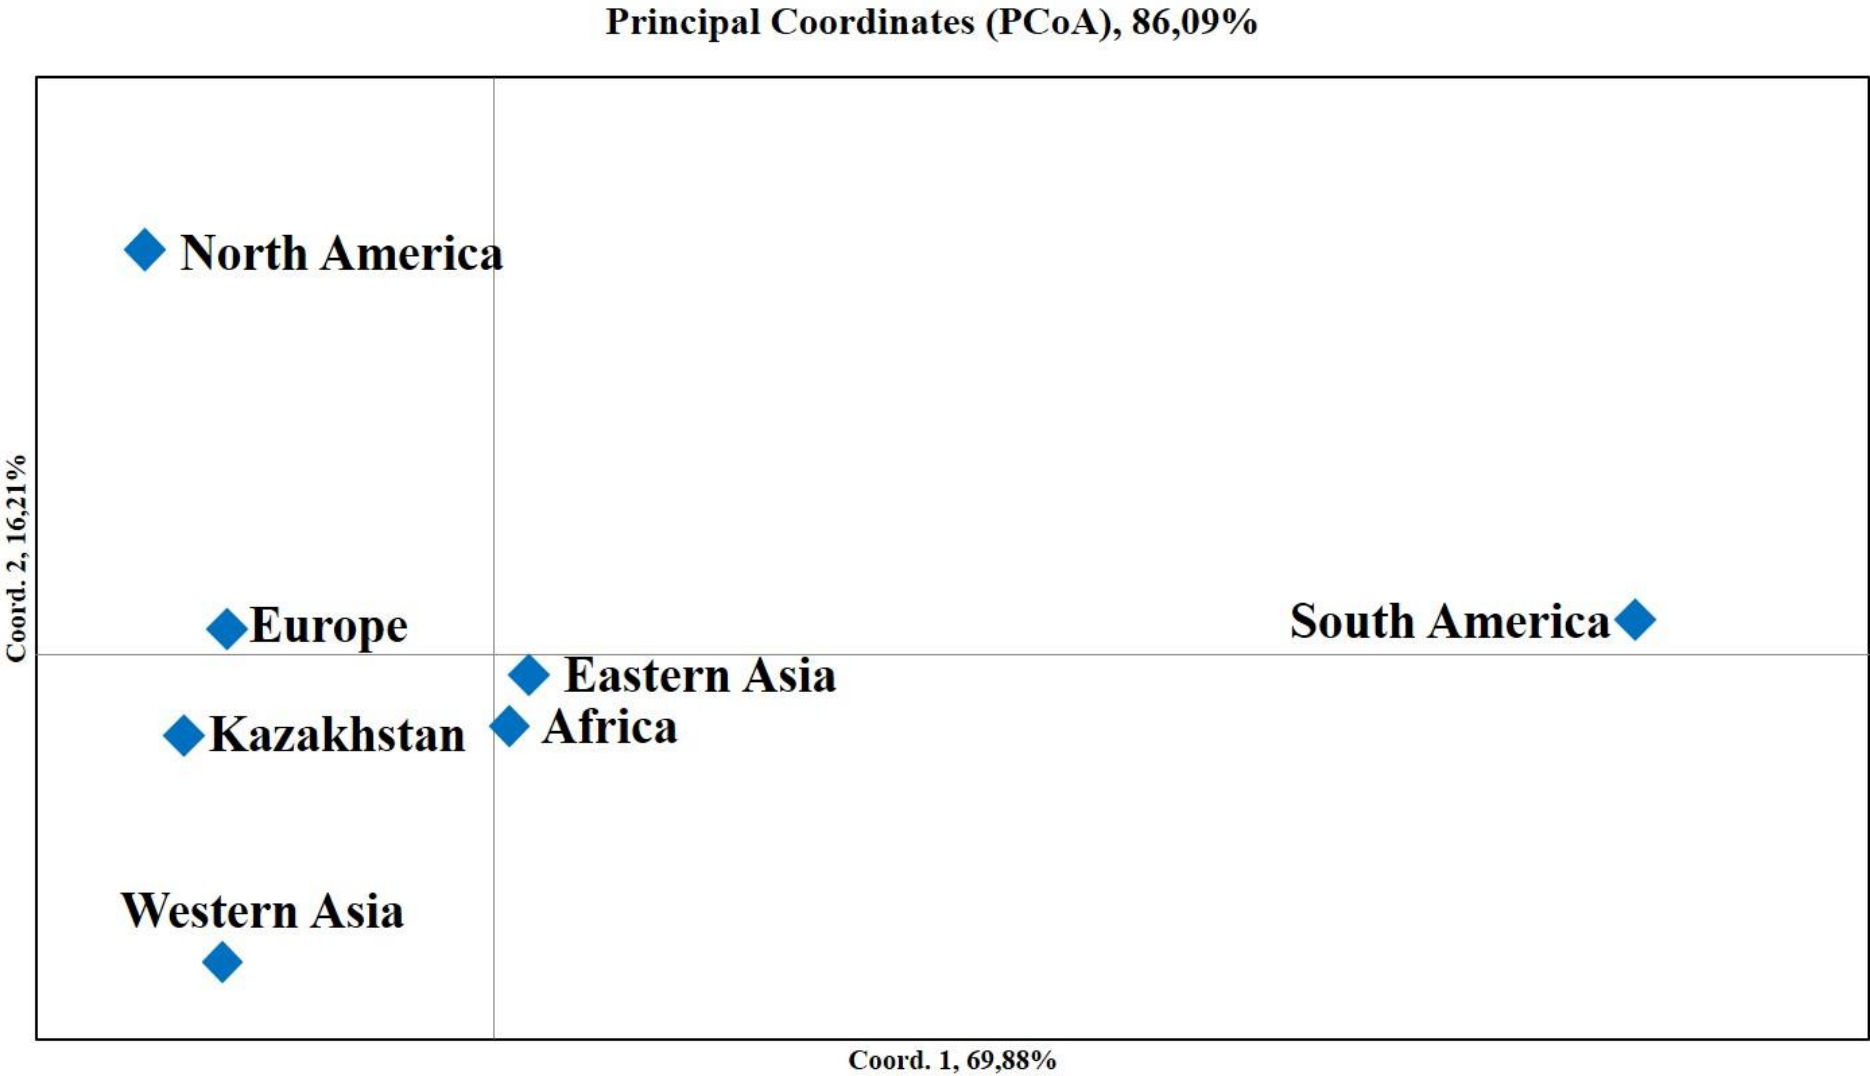

Supplement: s1 [file s1]
