# Supplementary figures and images for: Population Structure and Genetic Diversity of Two-Rowed Barley Accessions from Kazakhstan Based on SNP Genotyping Data
Source: MDPI journal article supplement (doi:10.3390/plants10102025), 2021-09-27

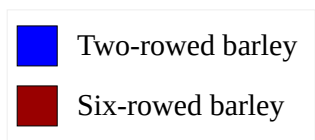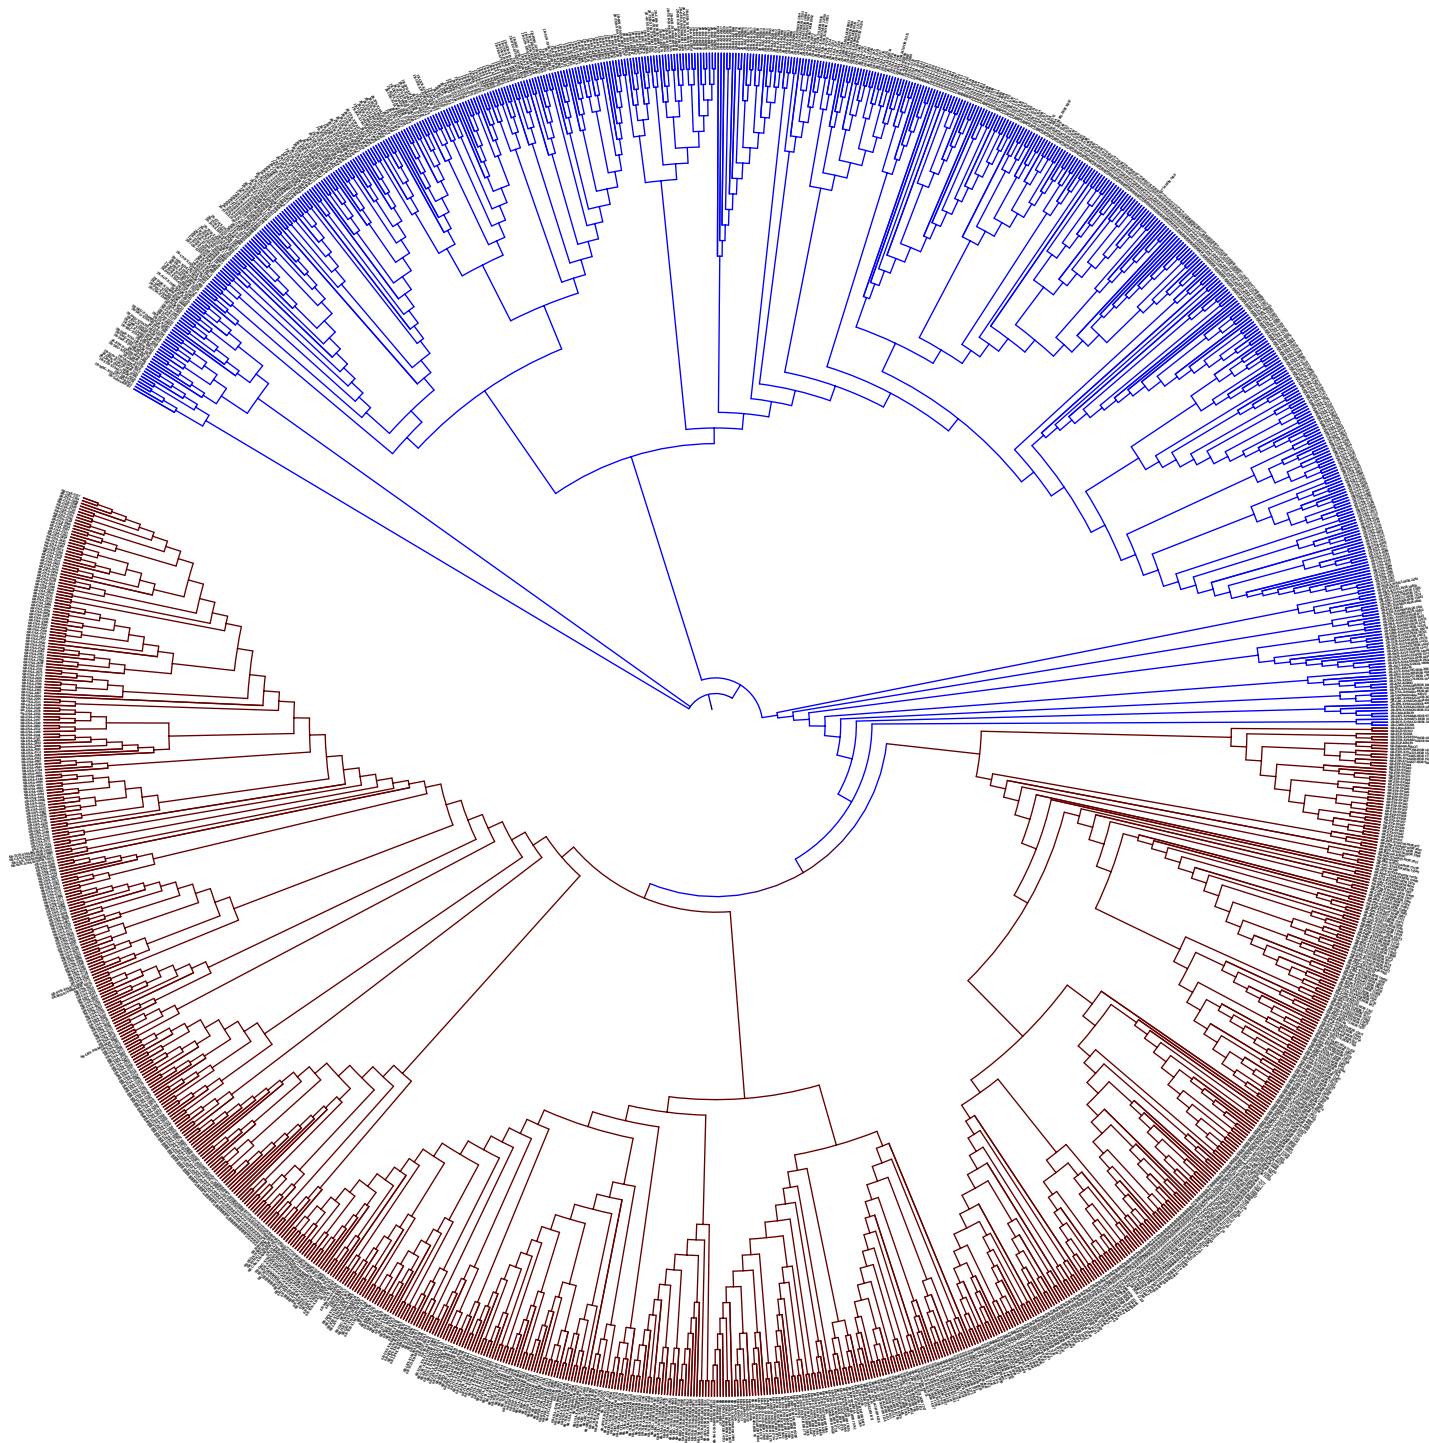

Supplement: s1 [file s1]

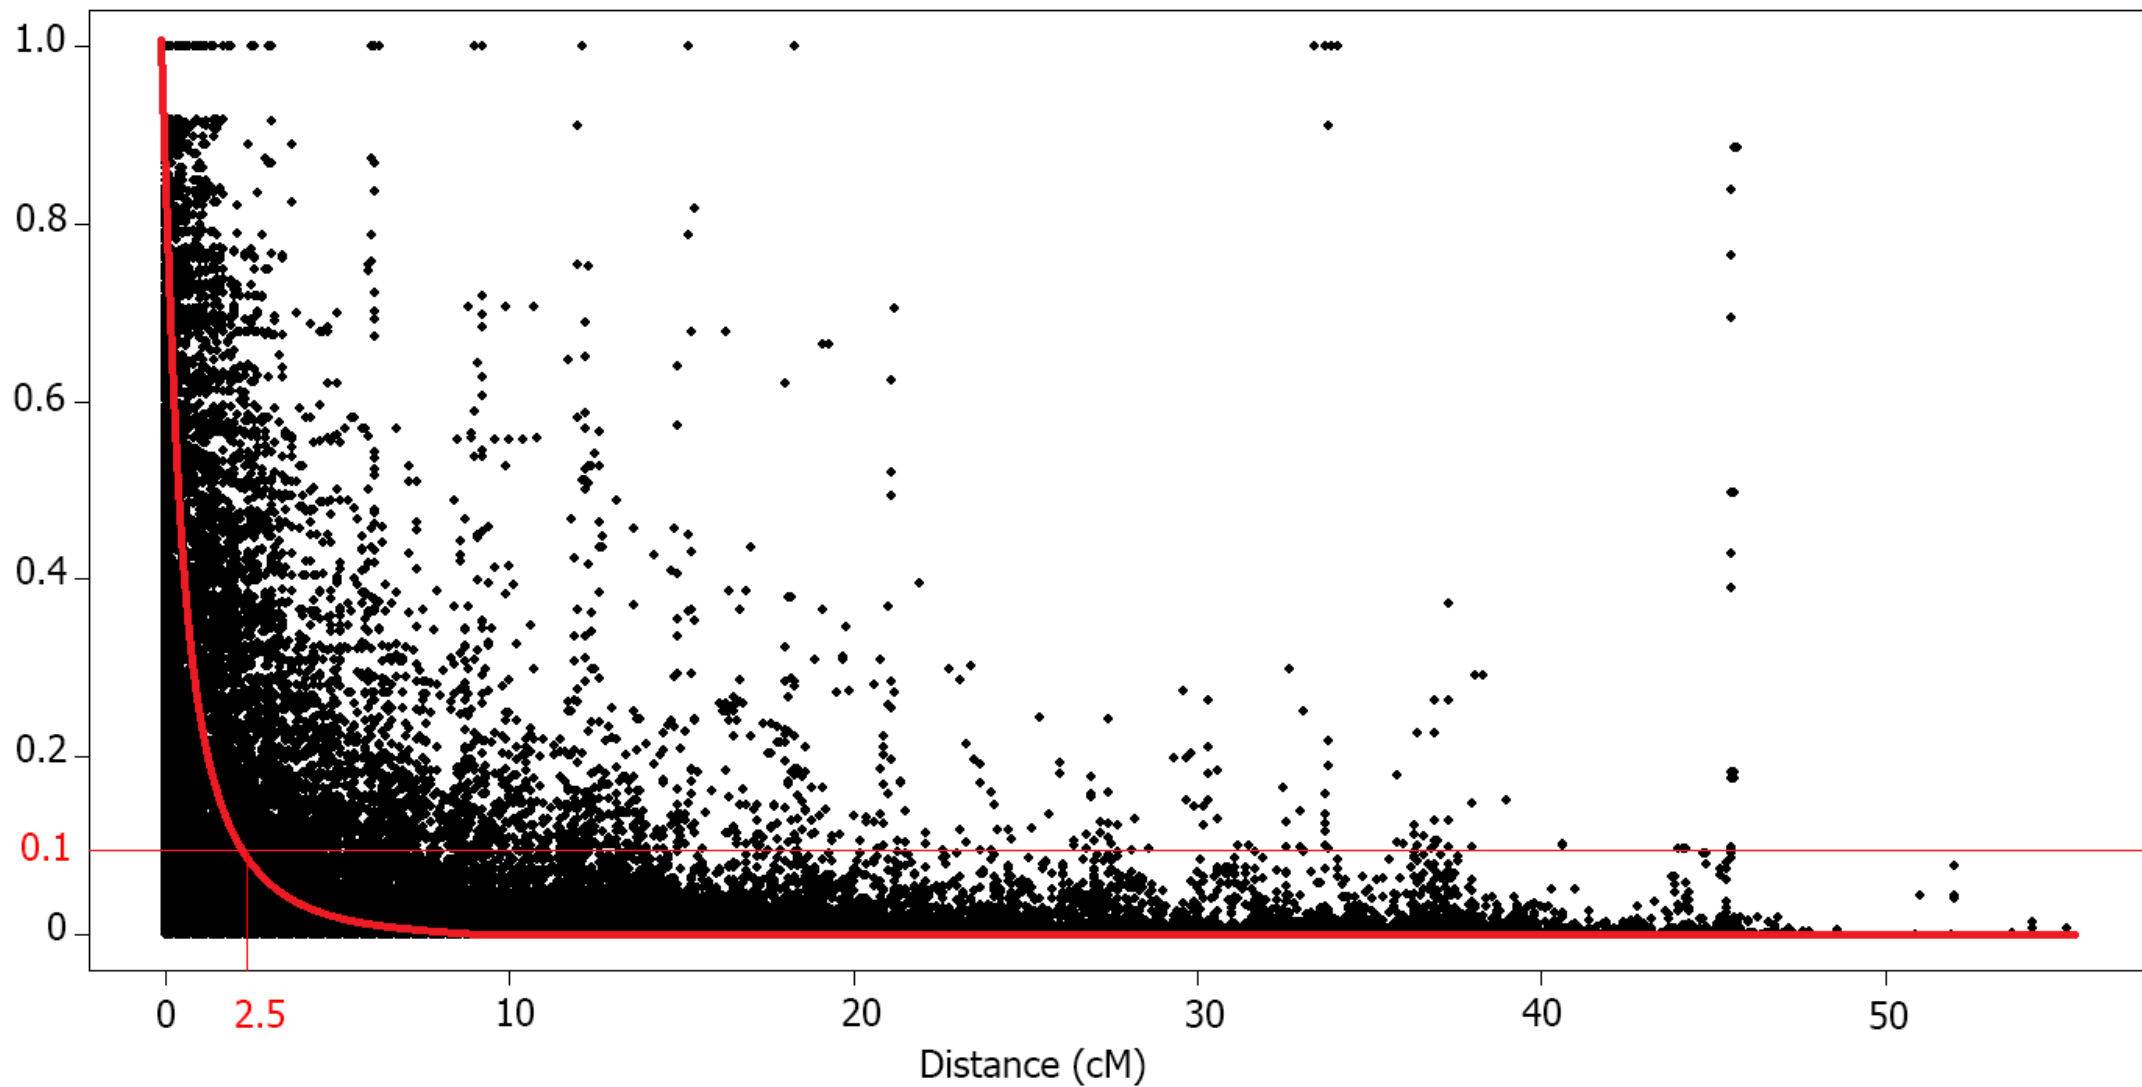

Supplement: s1 [file s1]

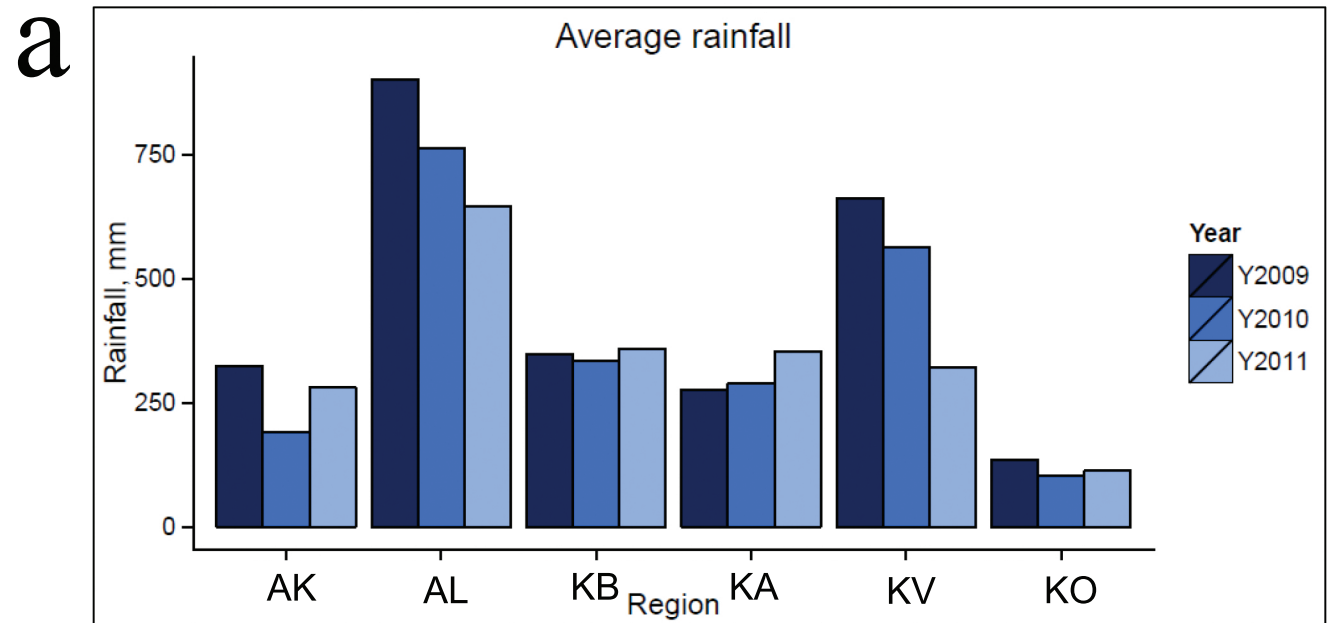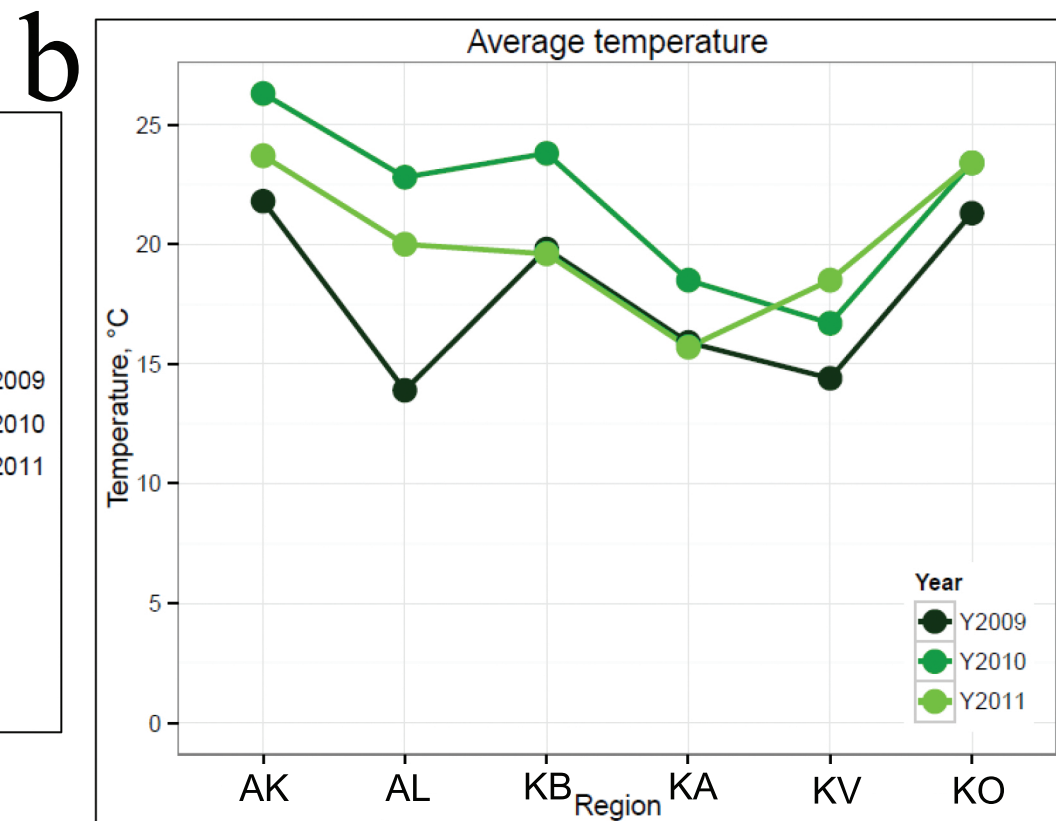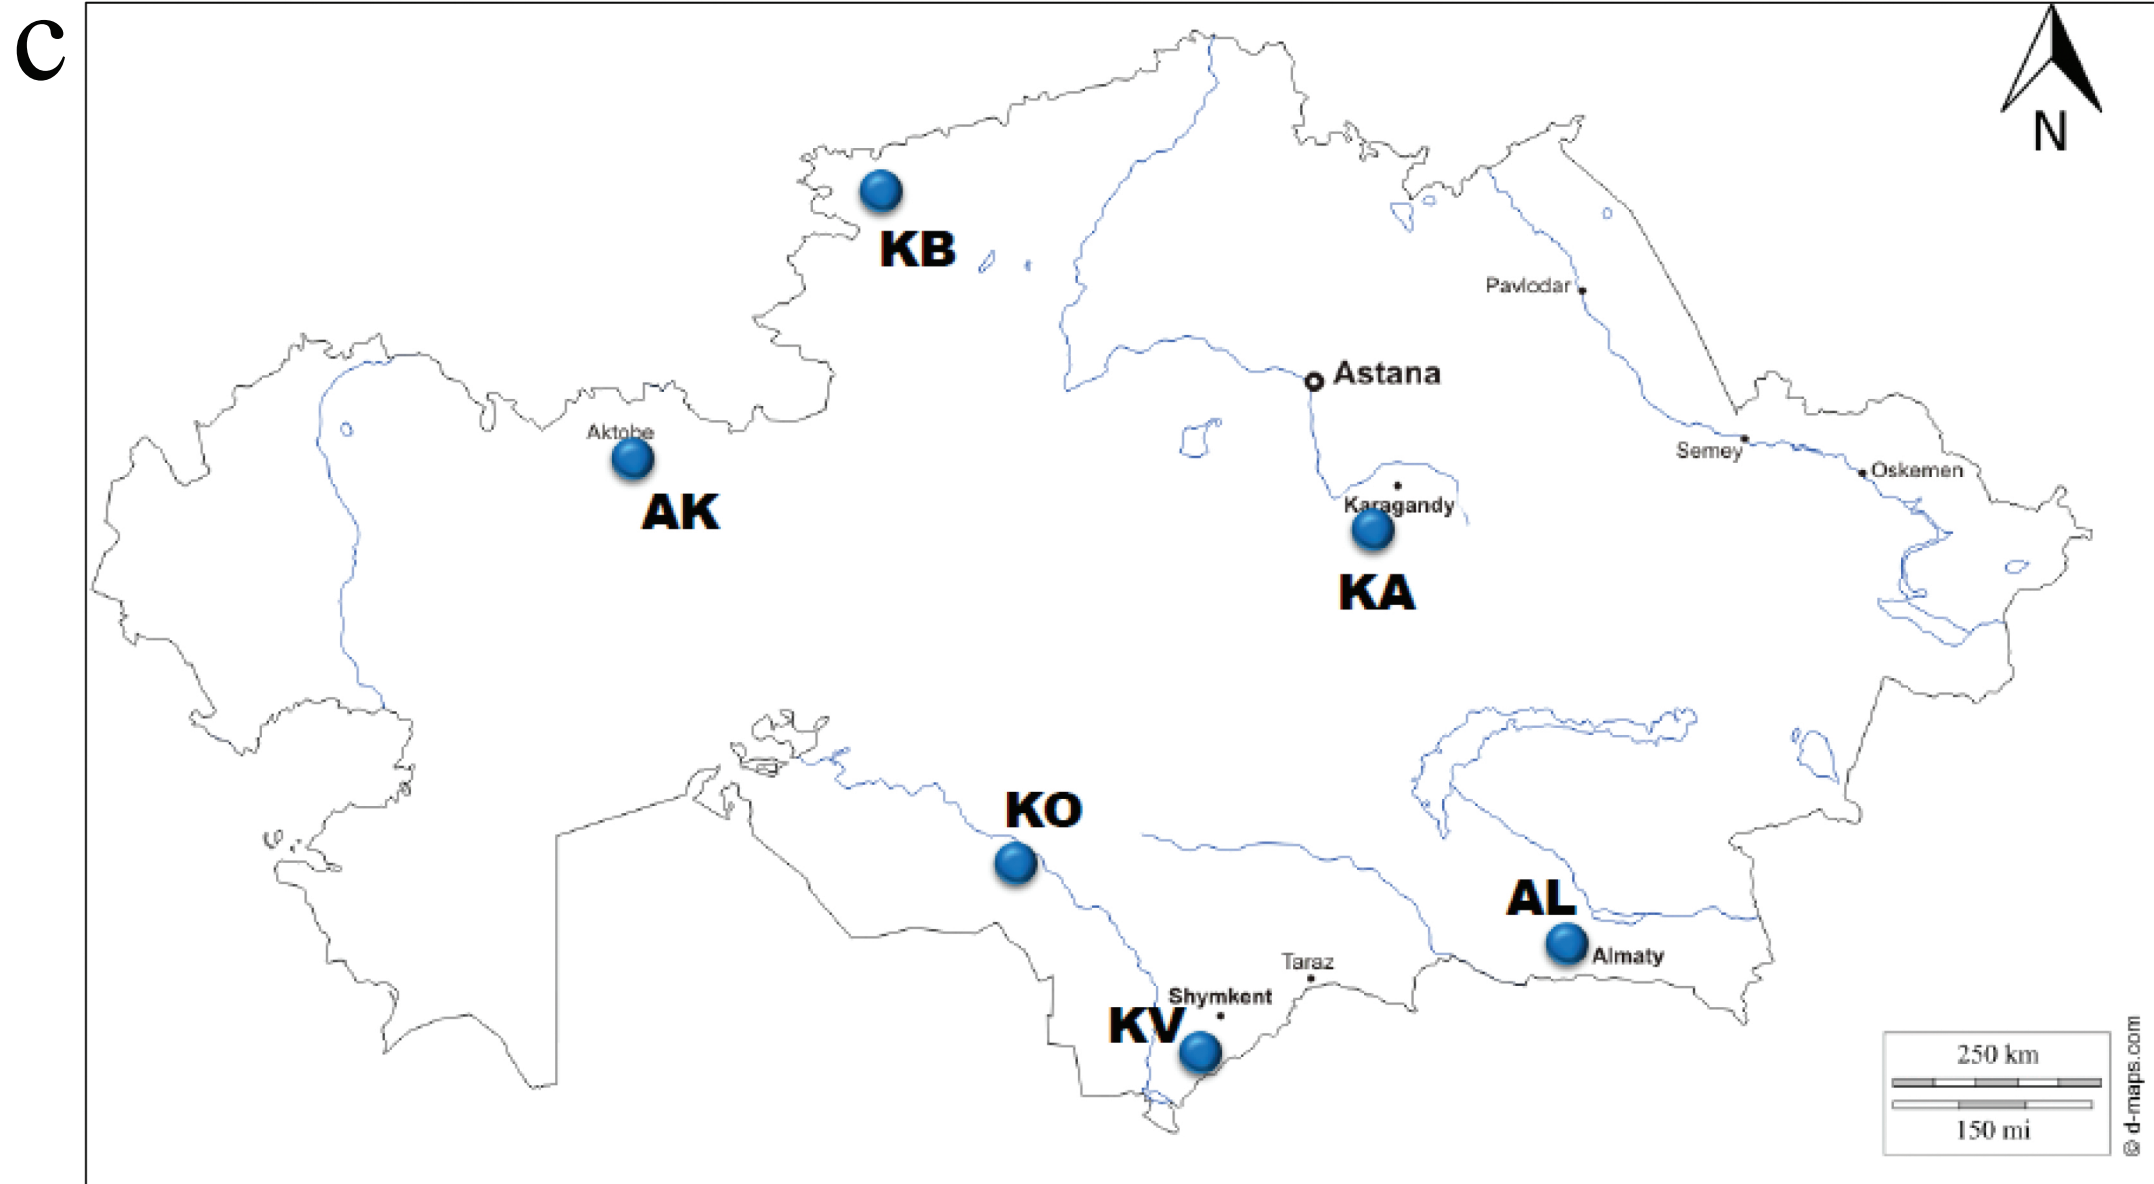

Supplement: s1 [file s1]
